# Supplementary material
Source: PubMed Central journal article supplement (PMC2000847)
Supplement: NIHMS26163-supplement-supp.pdf [file NIHMS26163-supplement-supp.pdf]

Supporting Information Table 1: Final energies obtained for the three minimized average structures<sup>†</sup>

|                               | shift restraints |       |       | shift +NOE restraints |       |       | NOE restraints |       |       | initial structures <sup>b</sup> |       |       |
|-------------------------------|------------------|-------|-------|-----------------------|-------|-------|----------------|-------|-------|---------------------------------|-------|-------|
|                               | P                | B     | A     | P                     | B     | A     | P              | B     | A     | P                               | B     | A     |
| $E_{\text{total}}^{\text{a}}$ | -2423            | -2373 | -2426 | -2110                 | -2102 | -2079 | -2518          | -2476 | -2298 | -2563                           | -2588 | -2489 |
| $E_{\text{bond}}$             | 75               | 73    | 75    | 85                    | 81    | 97    | 67             | 71    | 81    | 69                              | 66    | 66    |
| $E_{\text{angl}}$             | 230              | 241   | 240   | 340                   | 346   | 353   | 230            | 217   | 302   | 201                             | 191   | 244   |
| $E_{\text{dihe}}$             | 173              | 158   | 171   | 199                   | 172   | 188   | 154            | 162   | 169   | 136                             | 166   | 183   |
| $E_{\text{impr}}$             | 1.71             | 1.40  | 1.53  | 2.18                  | 1.76  | 2.19  | 2.57           | 1.43  | 2.45  | 1.12                            | 1.44  | 3.03  |
| $E_{\text{vdw}}$              | -56              | -14   | -39   | 26                    | 30    | 25    | -96            | -88   | -41   | -116                            | -139  | -70   |
| $E_{\text{shift}}$            | 35               | 45    | 29    | 54                    | 63    | 44    | -              | -     | -     | -                               | -     | -     |
| $E_{\text{NOE}}$              | -                | -     | -     | 42                    | 48    | 74    | 29             | 33    | 57    | -                               | -     | -     |

<sup>†</sup> In kcal/mol, final  $f_{\text{pc}} = 5 \text{ kcal/mol.ppm}^2$ ; scale(NOE) = 50 kcal/mol.Å<sup>2</sup>.

<sup>a</sup> Total energy is composed of bond, angle, dihedral, improper, van der Waals and electrostatic, as well as pseudocontact shift and NOE energies where indicated. Bond, angle, dihedral, van der Waals and improper energies are also listed.

<sup>b</sup> Initial structures (see text); minimized with no experimental restraints

Supporting Information Table 2: RMSD of average structures against families of structures for different models<sup>†</sup>

|                        |   | shift restraints |      |      | shift +NOE restraints |      |      | NOE restraints |      |      |
|------------------------|---|------------------|------|------|-----------------------|------|------|----------------|------|------|
|                        |   | P                | B    | A    | P                     | B    | A    | P              | B    | A    |
| shift restraints       | P | 0.29             | 0.67 | 1.03 | 0.80                  | 1.14 | 1.11 | 2.20           | 1.77 | 1.99 |
|                        | B | 0.68             | 0.31 | 1.13 | 0.94                  | 1.24 | 1.28 | 2.20           | 1.80 | 1.86 |
|                        | A | 1.06             | 1.15 | 0.22 | 1.20                  | 1.33 | 0.96 | 2.33           | 1.83 | 1.93 |
| shift + NOE restraints | P | 0.78             | 0.91 | 1.20 | 0.38                  | 1.05 | 0.94 | 2.10           | 1.69 | 1.83 |
|                        | B | 1.14             | 1.24 | 1.31 | 1.02                  | 0.37 | 1.02 | 2.14           | 1.69 | 2.01 |
|                        | A | 1.14             | 1.31 | 0.97 | 0.95                  | 1.05 | 0.31 | 2.19           | 1.69 | 1.78 |
| NOE restraints         | P | 2.18             | 2.20 | 2.31 | 2.10                  | 2.16 | 2.17 | 0.46           | 2.24 | 2.10 |
|                        | B | 1.65             | 1.58 | 1.64 | 1.49                  | 1.67 | 1.52 | 2.47           | 1.53 | 1.71 |
|                        | A | 1.98             | 1.88 | 1.91 | 1.82                  | 2.00 | 1.74 | 2.07           | 1.71 | 0.48 |
| initial structures     | P | 1.65             | 1.67 | 1.71 | 1.60                  | 1.70 | 1.58 | 2.06           | 1.65 | 1.59 |
|                        | B | 1.93             | 2.10 | 1.92 | 1.74                  | 1.61 | 1.54 | 2.63           | 1.90 | 2.32 |
|                        | A | 2.59             | 2.50 | 2.54 | 2.42                  | 2.74 | 2.55 | 3.02           | 2.15 | 2.47 |

<sup>†</sup>In Å, minimized average structure vertically, families of structures (20 for P, B; 10 for A) horizontally; excluding hydrogens and DNA terminal base pairs; see text for definition of P,B and A. See footnote of Supporting Information Table 1 for details on refinement force constants and initial structures.

Supporting Information Table 3: Structural statistics of the minimized averaged structures and of initial structures<sup>†</sup>

|                         | shift restraints |       |       | shift +NOE restraints |       |       | NOE restraints |       |       | initial structures |       |       |
|-------------------------|------------------|-------|-------|-----------------------|-------|-------|----------------|-------|-------|--------------------|-------|-------|
|                         | P                | B     | A     | P                     | B     | A     | P              | B     | A     | P                  | B     | A     |
| rmsd bond <sup>a</sup>  | 0.017            | 0.016 | 0.017 | 0.018                 | 0.017 | 0.019 | 0.016          | 0.016 | 0.016 | 0.016              | 0.016 | 0.016 |
| rmsd angle <sup>b</sup> | 2.89             | 2.96  | 2.97  | 3.75                  | 3.72  | 3.74  | 3.04           | 2.84  | 3.57  | 2.73               | 3.12  | 2.68  |
| rmsd impr <sup>c</sup>  | 4.22             | 3.81  | 3.97  | 4.16                  | 3.43  | 3.74  | 4.11           | 3.32  | 3.52  | 2.38               | 5.29  | 3.38  |
| rmsd NOE <sup>d</sup>   | 0.328            | 0.331 | 0.355 | 0.031                 | 0.035 | 0.043 | 0.027          | 0.029 | 0.038 | 0.231              | 0.378 | 0.292 |
| # NOE <sup>e</sup>      | 53               | 54    | 58    | 0                     | 0     | 0     | 0              | 0     | 0     | 55                 | 87    | 68    |
| rmsd shift <sup>f</sup> | 0.30             | 0.32  | 0.30  | 0.34                  | 0.35  | 0.43  | 5.38           | 7.33  | 11.08 | 7.06               | 57.52 | 29.94 |
| # shift <sup>g</sup>    | 28               | 37    | 30    | 38                    | 42    | 29    | 230            | 190   | 262   | 197                | 272   | 275   |

<sup>†</sup>See footnote of Supporting Information Table 1 for details on refinement force constants and initial structures.

<sup>a</sup>r.m.s.d. of bond lengths from ideal geometry (Å)

<sup>b</sup>r.m.s.d. of bond angles from ideal geometry (deg)

<sup>c</sup>r.m.s.d. of improper angles from ideal geometry (deg)

<sup>d</sup>r.m.s.d. of NOE violations from experimental distance restraints (Å)

<sup>e</sup>no. NOE violations > 0.3Å

<sup>f</sup>r.m.s.d. of pseudocontact shifts from experimental pseudocontact shifts (ppm)

<sup>g</sup>no. of shift violations exceeding tol (experimental error) + gradient error (see text)
